# Supplementary material for: Dam type and topological position govern ice-marginal lake area change in Alaska and NW Canada between 1984 and 2019
Source: Copernicus journal article supplement (doi:10.5194/tc-2021-143), 2021-06-08
Supplement: Supplementary file 1 [file tc-2021-143-supplement.pdf]

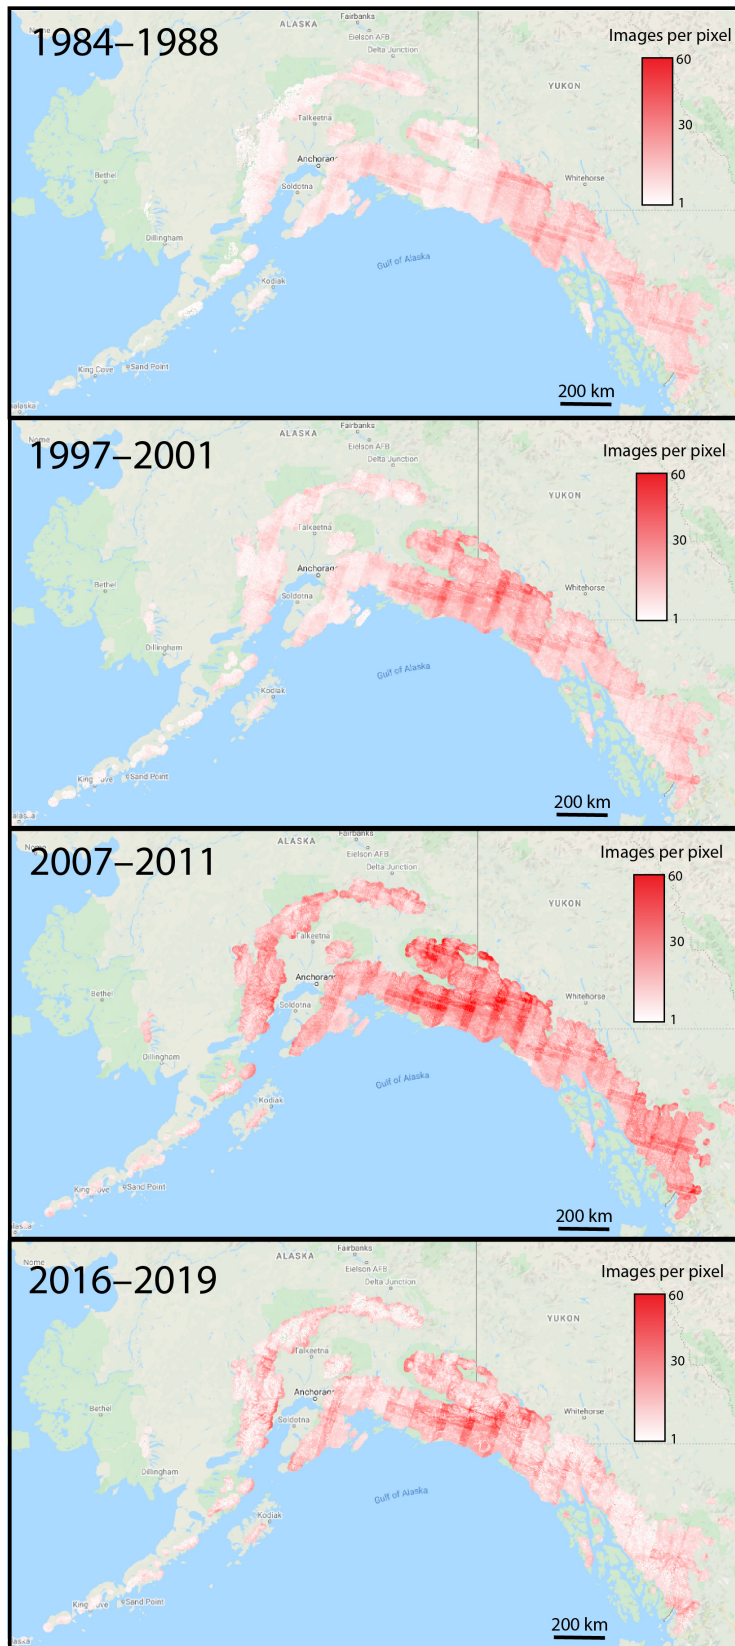

**Fig. S1.** Images per pixel per time period for each mosaic (median of each pixel value) used in analysis. Maps created in © Google Earth Engine (Gorelick et al., 2017).

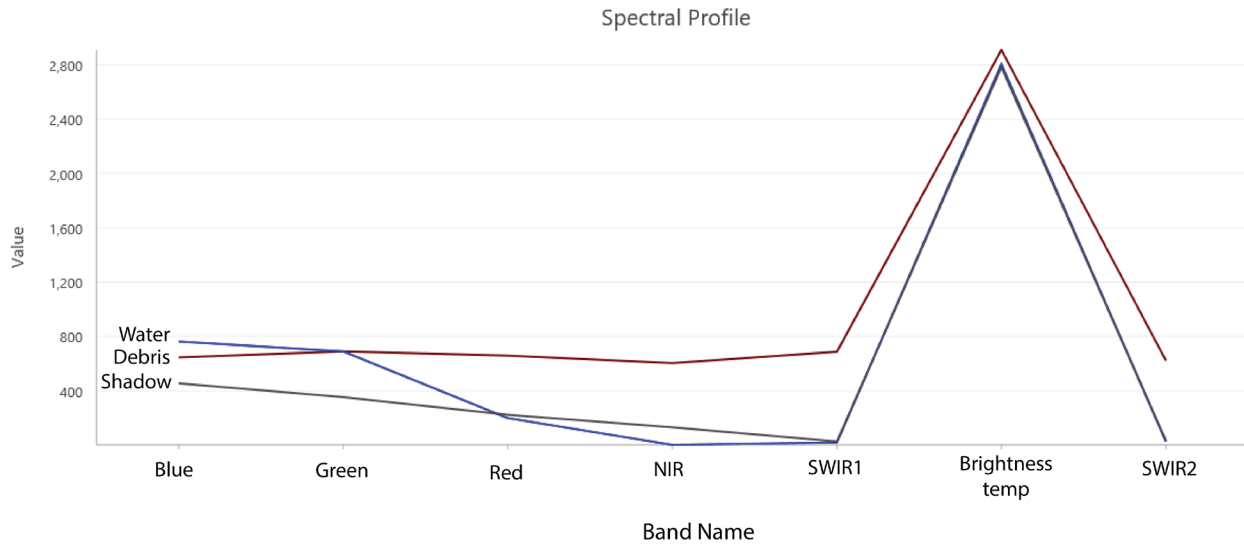

**Fig. S2.** Spectral comparison of water, mountain shadow, and a debris band.

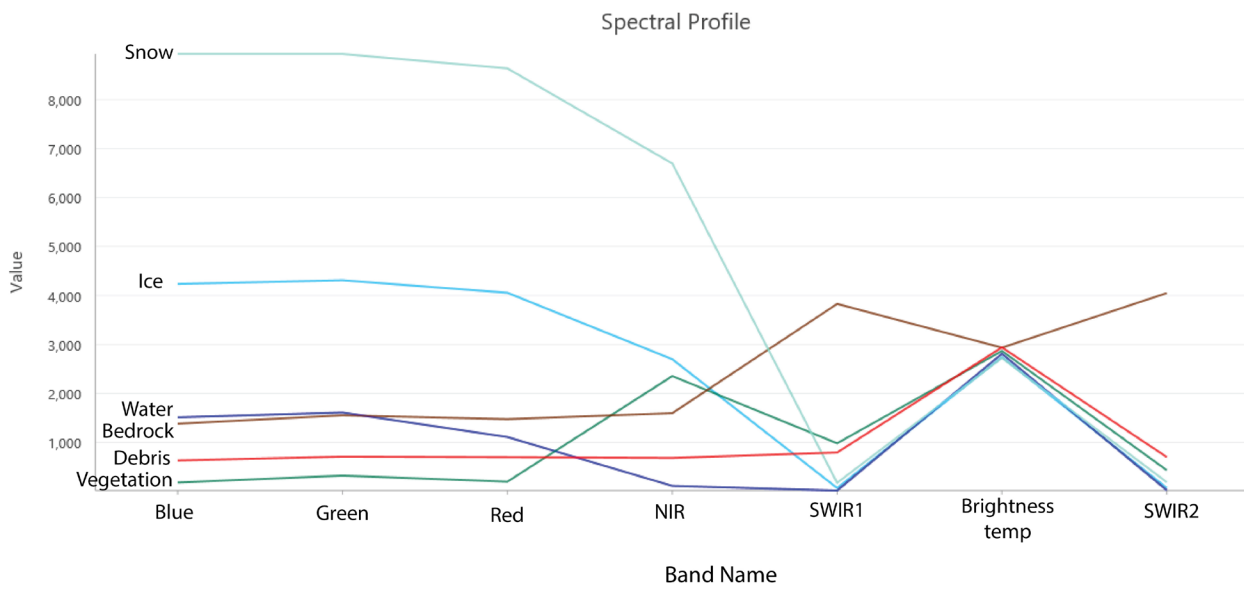

**Fig. S3.** Example spectral profiles for each landcover type (snow, ice, water, bedrock, debris, and vegetation) used in supervised classification.

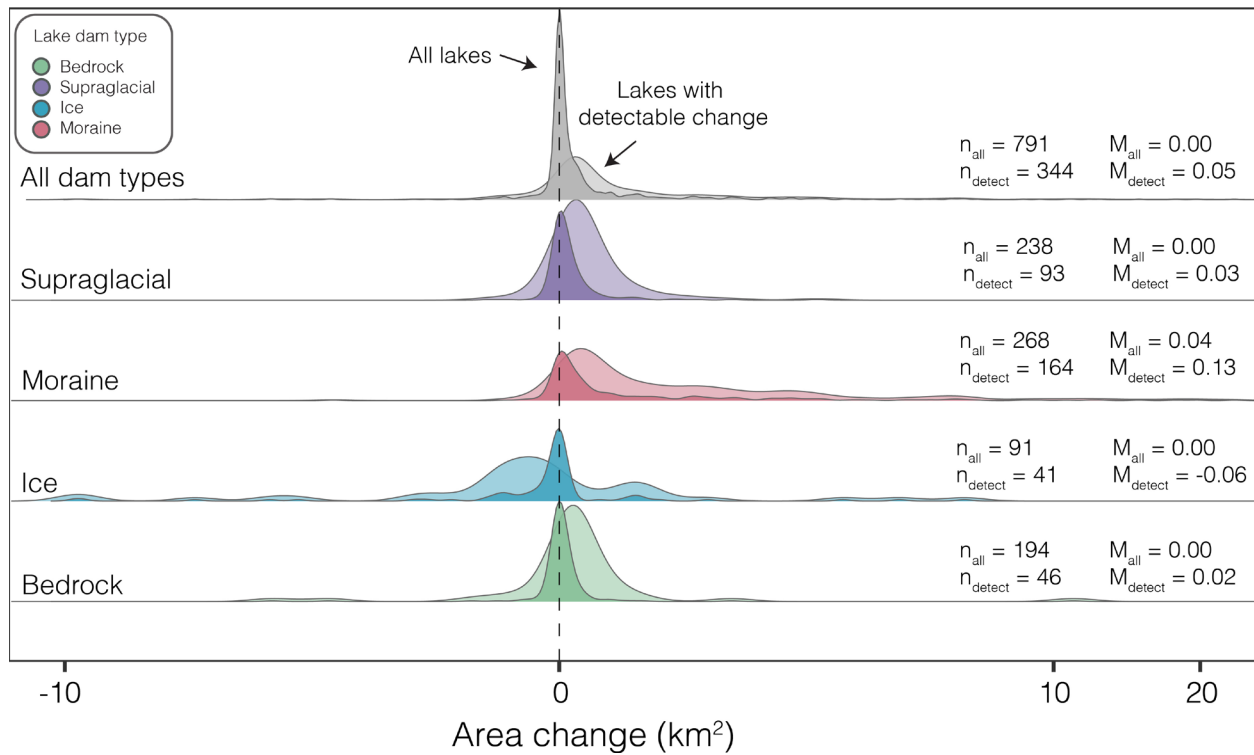

**Fig. S4.** Smoothed density distribution (normalized to 1 for each dam type) of absolute lake area change for all lakes (dark curves) and lakes with detectable change (light curves) for each dam type, with number of lakes ( $n$ ) and median lake area change ( $M$ ).

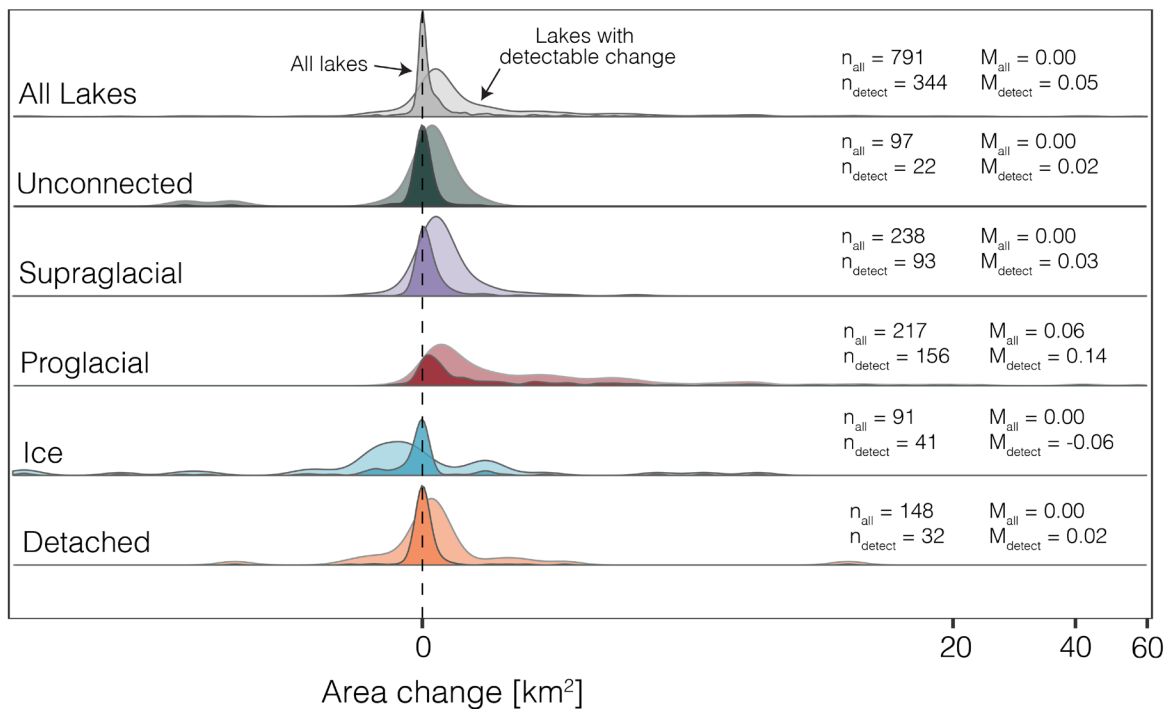

**Fig. S5.** Distribution of lake area change ( $\text{km}^2$ ) for all lakes (dark curves) and lakes with detectable change (light curves) for each topological position, with number of lakes ( $n$ ) and median lake area change ( $M$ ).

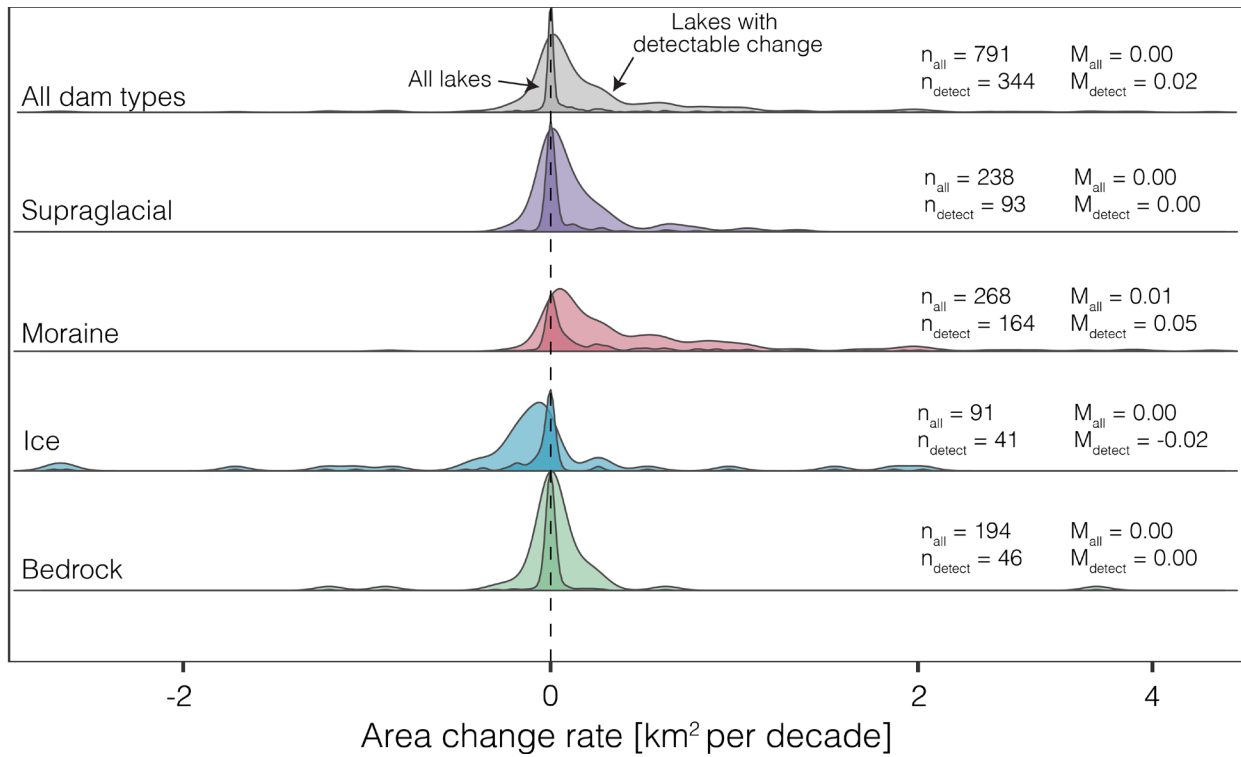

**Fig. S6:** Distribution of lake area change rate ( $\text{km}^2$  per decade) for all lakes (dark curves) and lakes with detectable change (light curves) for each dam type, with number of lakes ( $n$ ) and median lake area change ( $M$ ).

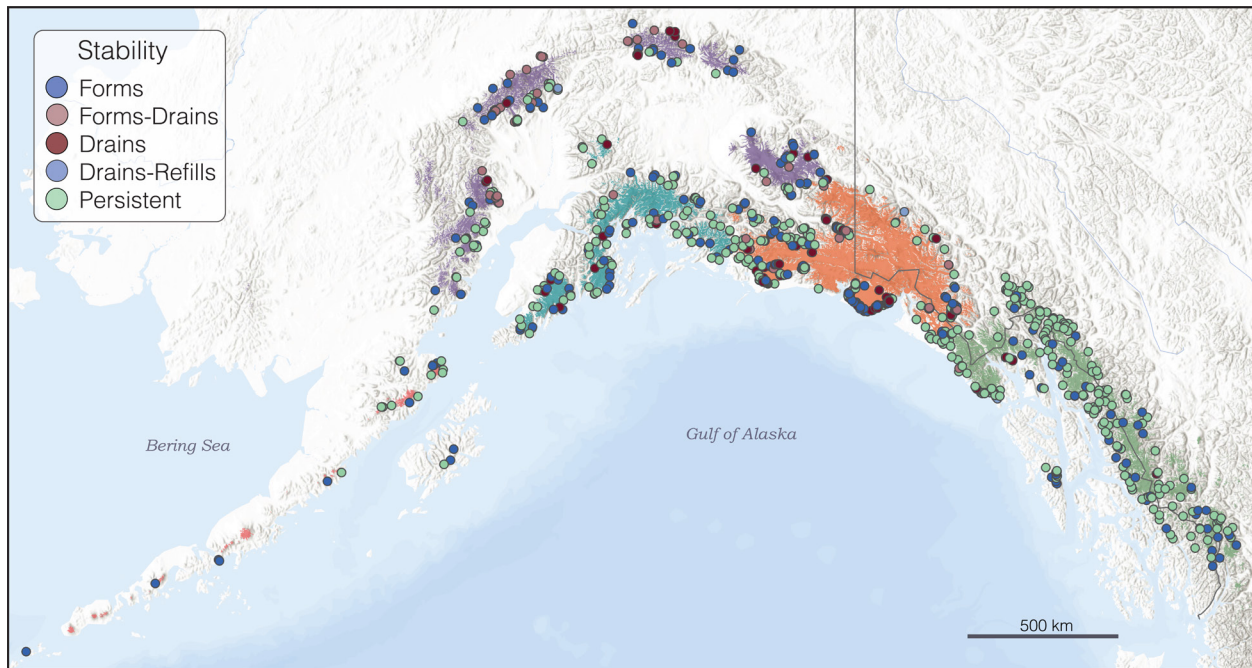

**Fig. S7.** Lake stability distribution across Alaska. Each dot represents an individual lake. Colored areas refer to the RGI subregions (see Fig. 1) (basemap provided by ESRI, 2021).
